# Supplementary material for: Neuroprotective Mechanism of Icariin on Hypoxic Ischemic Brain Damage in Neonatal Mice
Source: Oxid Med Cell Longev. 2022 Nov 15;2022:1330928. doi: 10.1155/2022/1330928 (PMC9681555; doi:10.1155/2022/1330928)
Supplement: Supplementary Materials — To make the article concise and clear, we consider putting the results of in vitro experiments into supplementary materials to support the conclusions of in vivo experiments, and the data of our in vivo experiments are sufficient to support our conclusions in each part. Please refer to the supplementary materials for results and description of all in vitro experiments. [file 1330928.f1.zip]

Archive with 31 entries (31 files):
- Supplementary material 1 (1).docx
- Supplementary material 1 (1).pdf
- Supplementary material 10 (1).docx
- Supplementary material 10 (1).pdf
- Supplementary material 11 (1).docx
- Supplementary material 11 (1).pdf
- Supplementary material 12 (1).docx
- Supplementary material 12 (1).pdf
- Supplementary material 13 (1).docx
- Supplementary material 13-1.pdf
- Supplementary material 13-2.pdf
- Supplementary material 14 (1).docx
- Supplementary material 14 (1).pdf
- Supplementary material 2 (1).docx
- Supplementary material 2 (1).pdf
- Supplementary material 3 (1).docx
- Supplementary material 3 (1).pdf
- Supplementary material 4 (1).docx
- Supplementary material 4-1.pdf
- Supplementary material 4-2.pdf
- Supplementary material 5 (1).docx
- Supplementary material 5 (1).pdf
- Supplementary material 6 (1).docx
- Supplementary material 6 (1).pdf
- Supplementary material 7 (1).docx
- Supplementary material 7 (1).pdf
- Supplementary material 8 (1).docx
- Supplementary material 8 (1).pdf
- Supplementary material 9 (1).docx
- Supplementary material 9-1.pdf
- Supplementary material 9-2.pdf
