# Supplementary figures and images for: Neuroprotective Mechanism of Icariin on Hypoxic Ischemic Brain Damage in Neonatal Mice
Source: Hindawi journal article supplement (doi:10.1155/2022/1330928), 2022-01-01

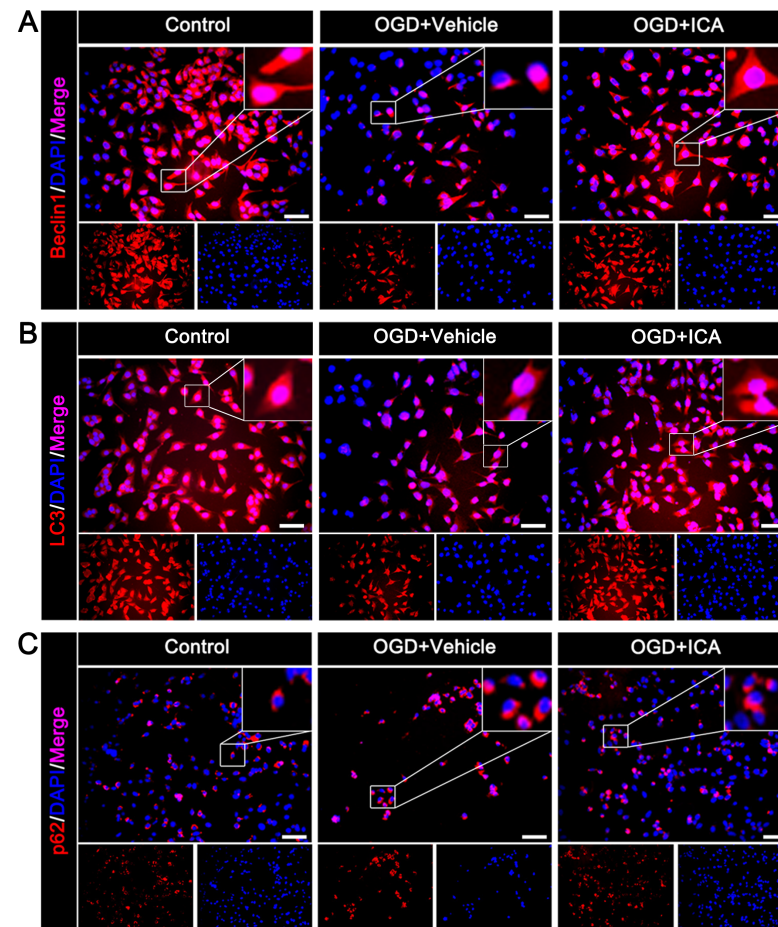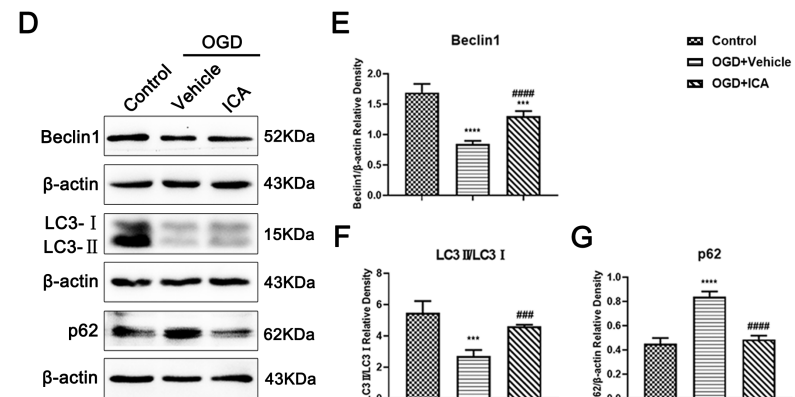

Supplement: f1 [file 1330928.f1.zip]

**A**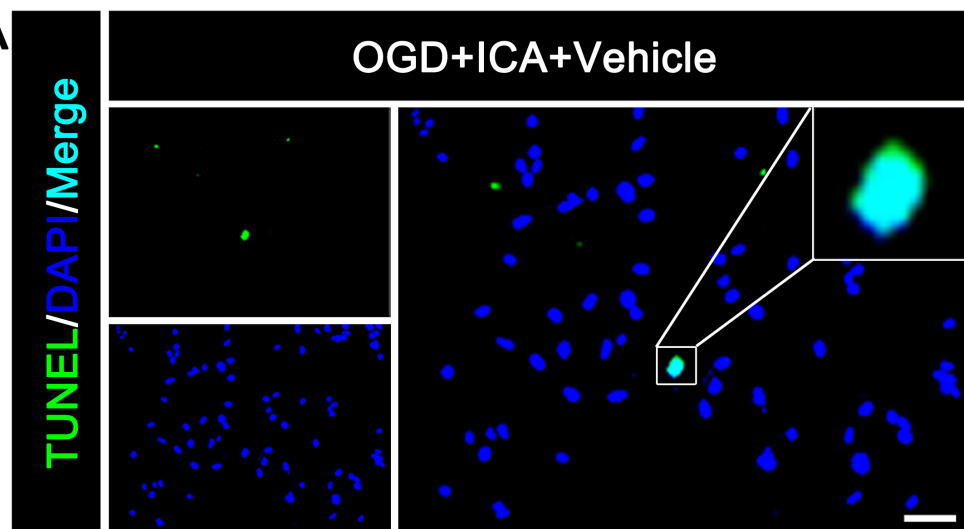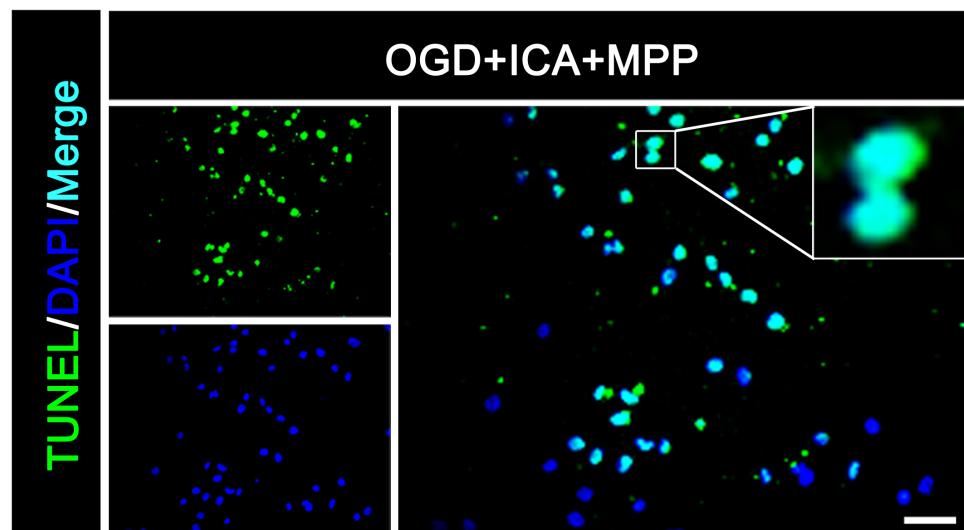**B**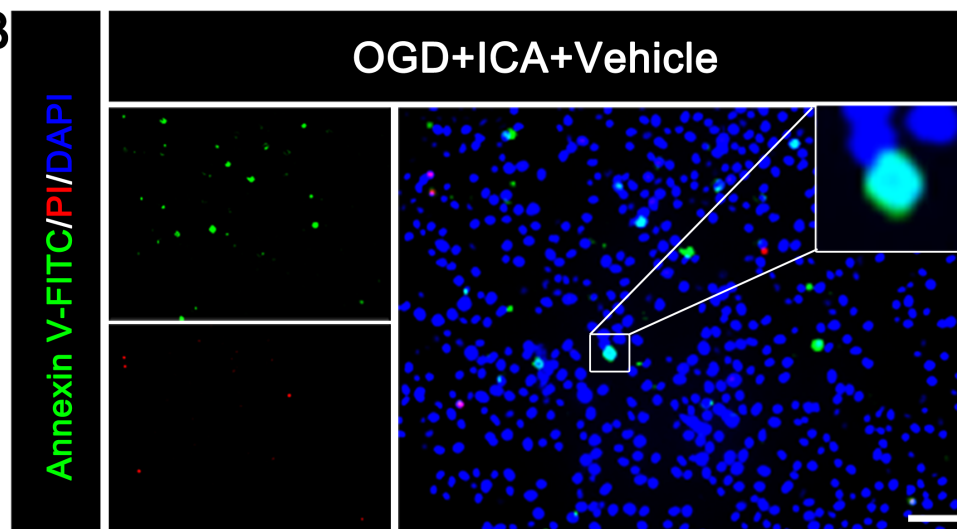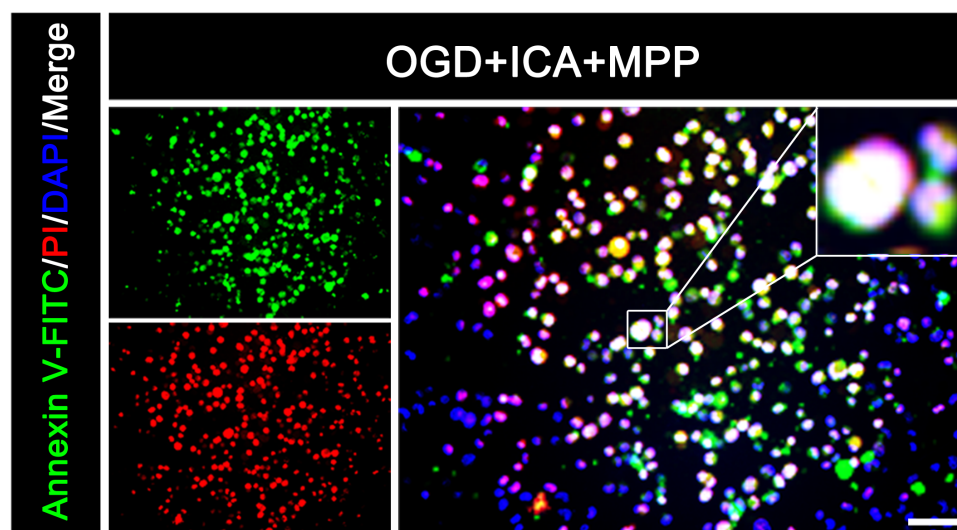

Supplement: f1 [file 1330928.f1.zip]

**A**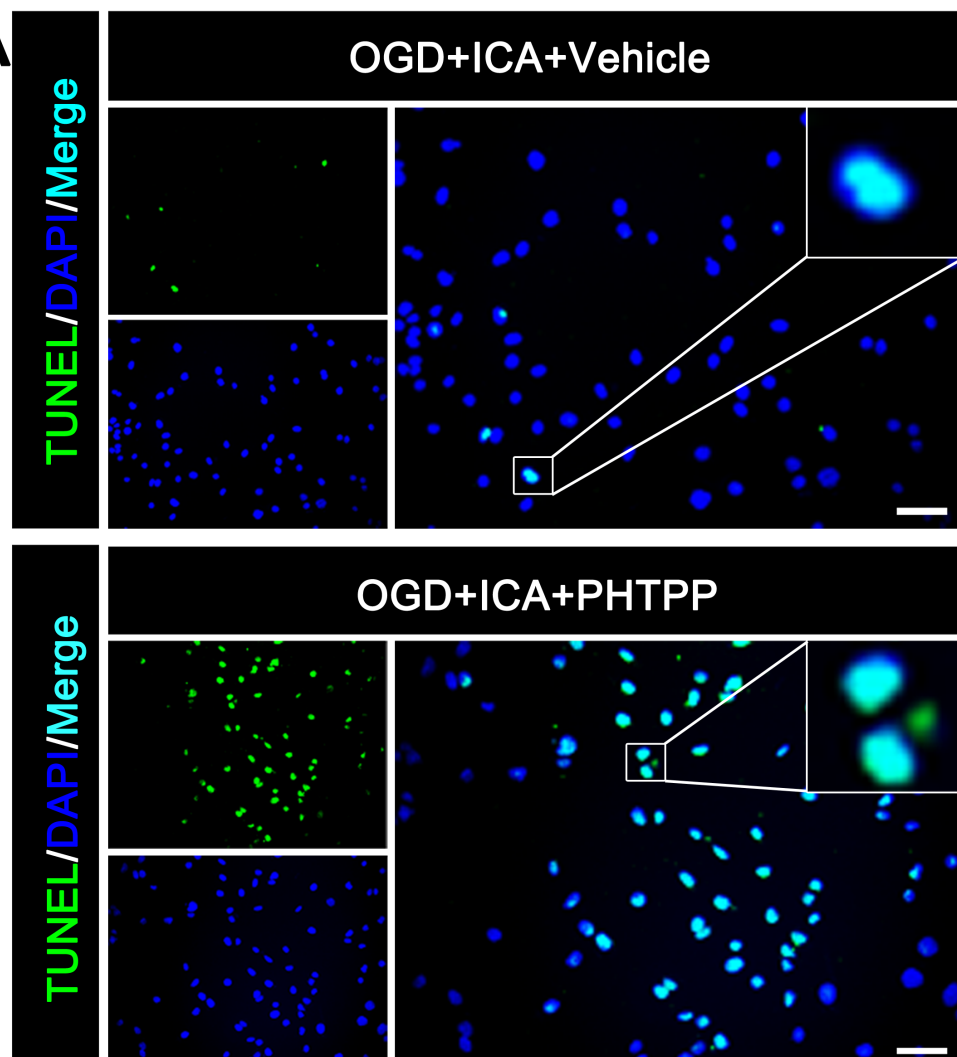**B**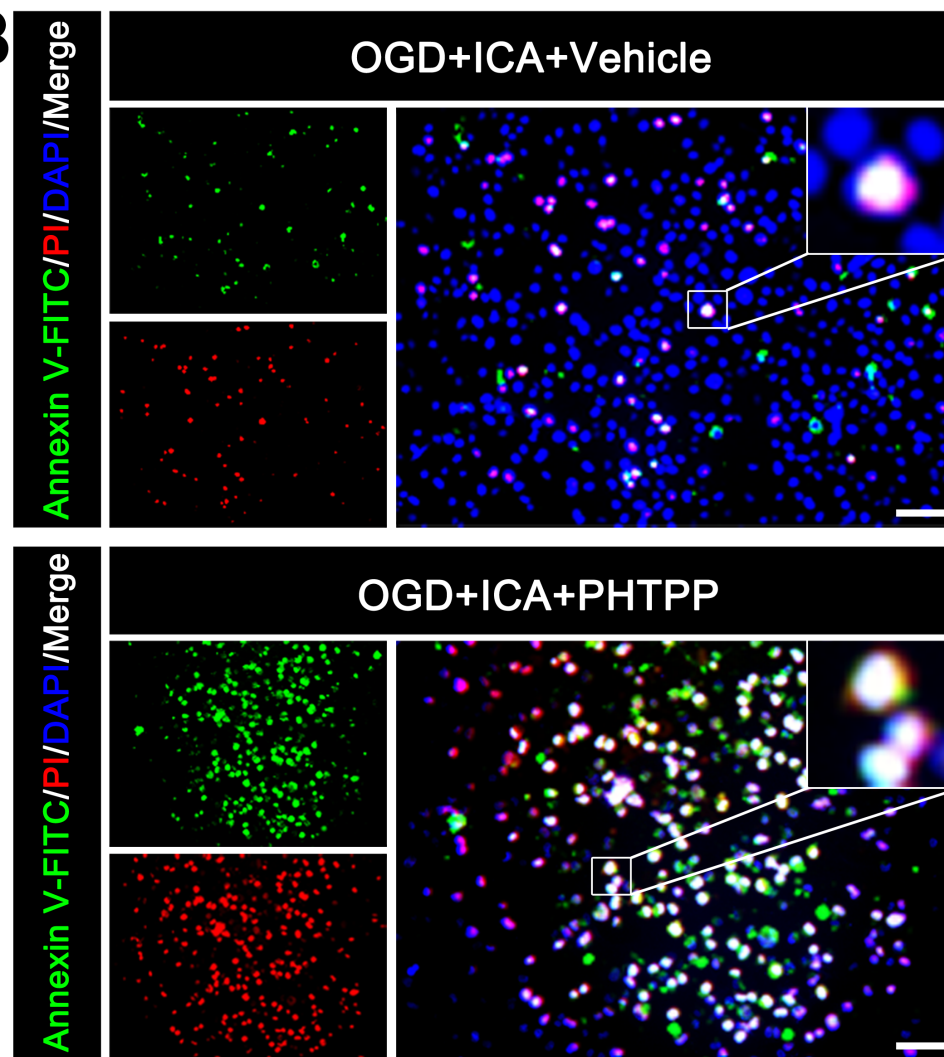

Supplement: f1 [file 1330928.f1.zip]

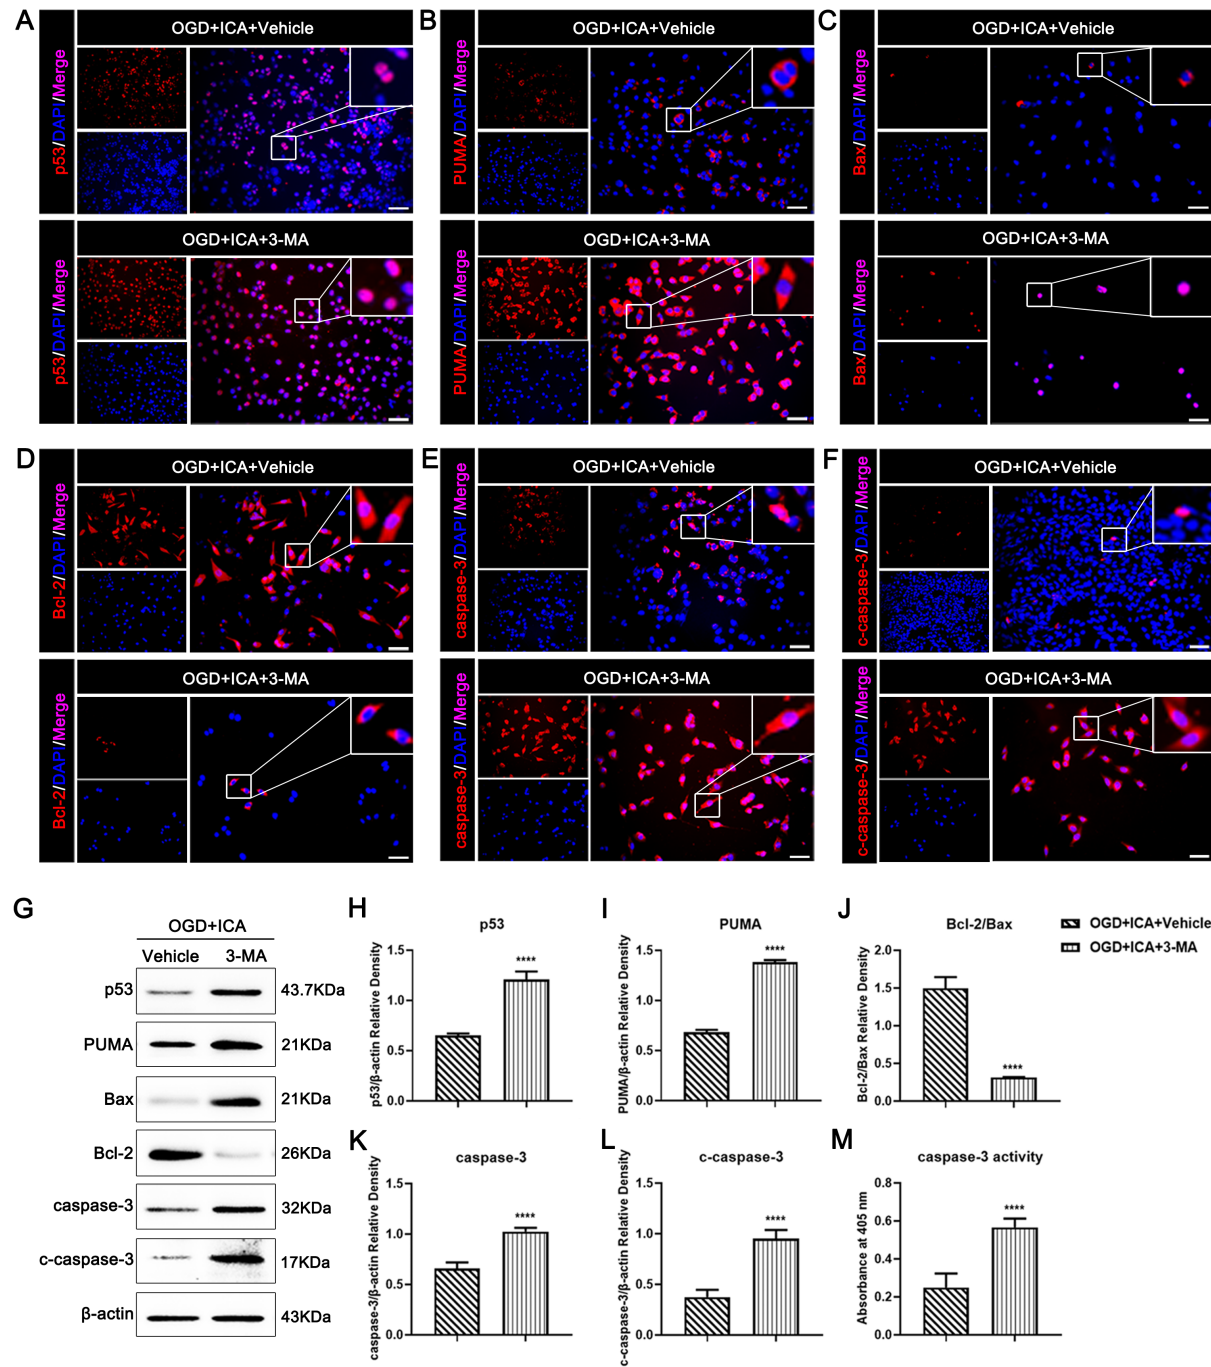

Supplement: f1 [file 1330928.f1.zip]

**A**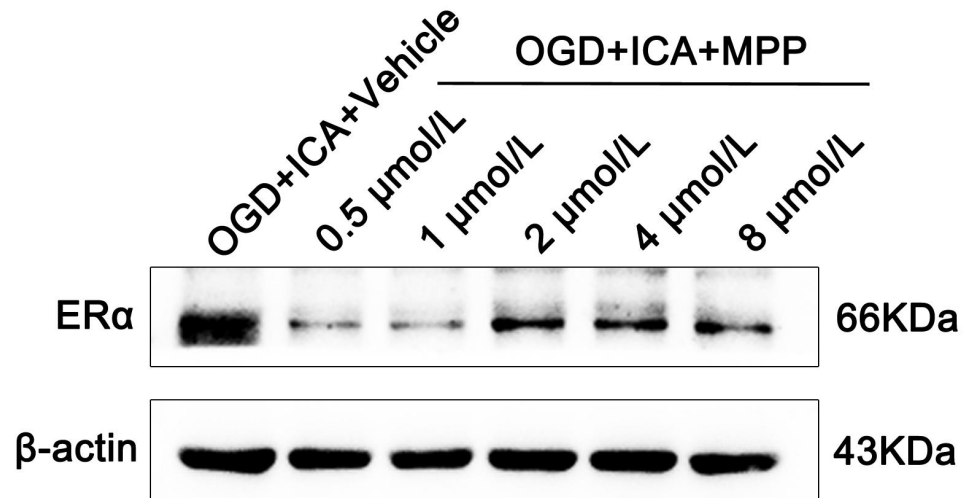**B**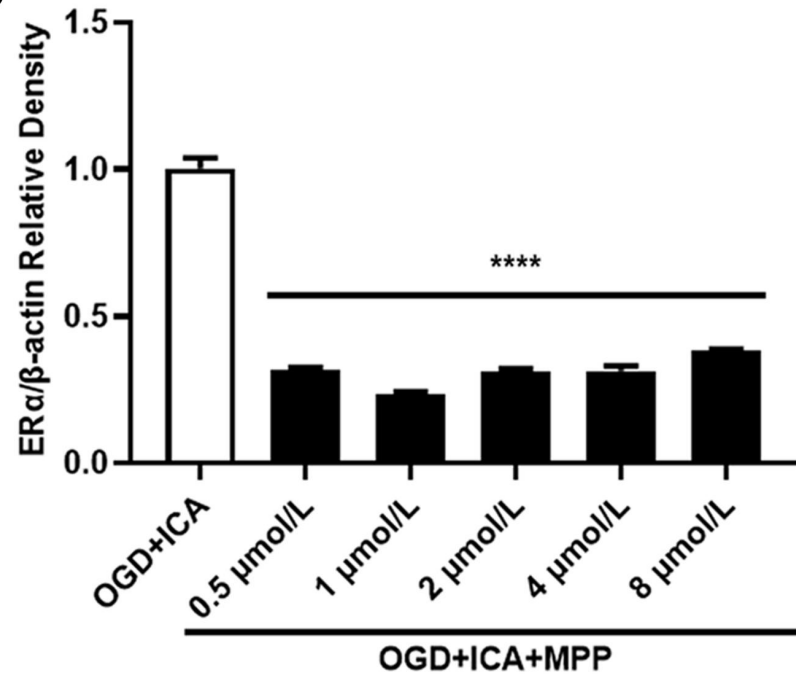**C**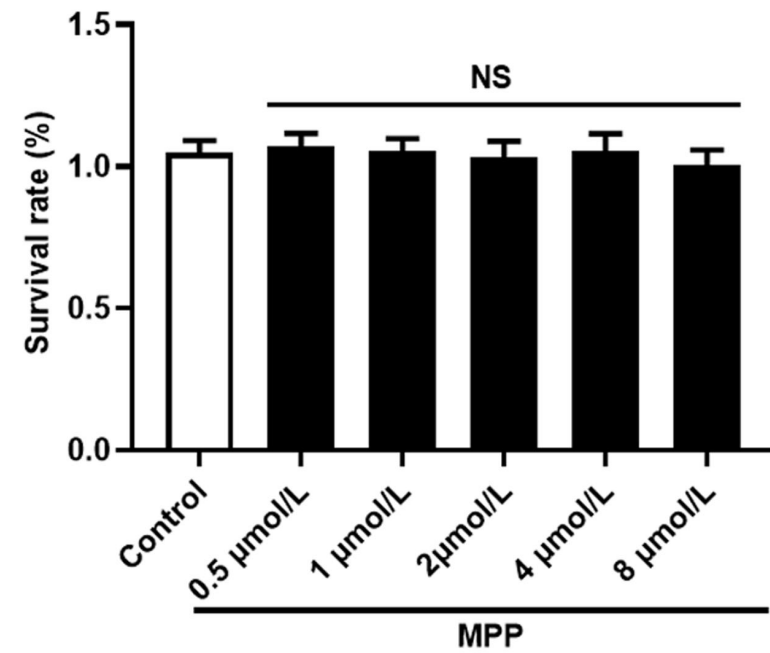

Supplement: f1 [file 1330928.f1.zip]

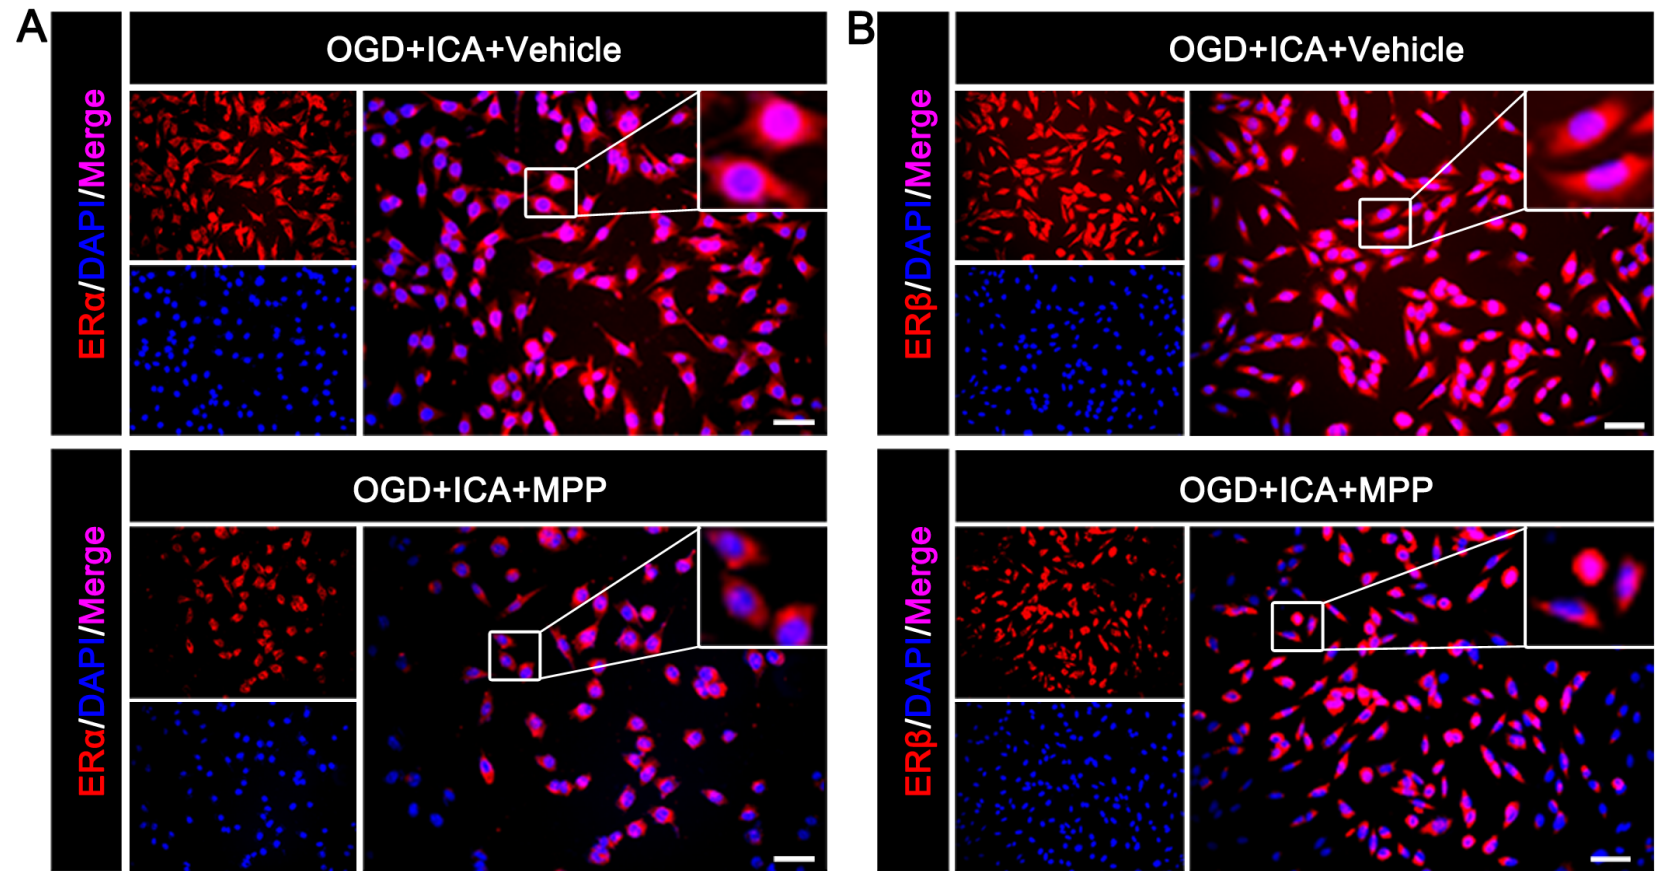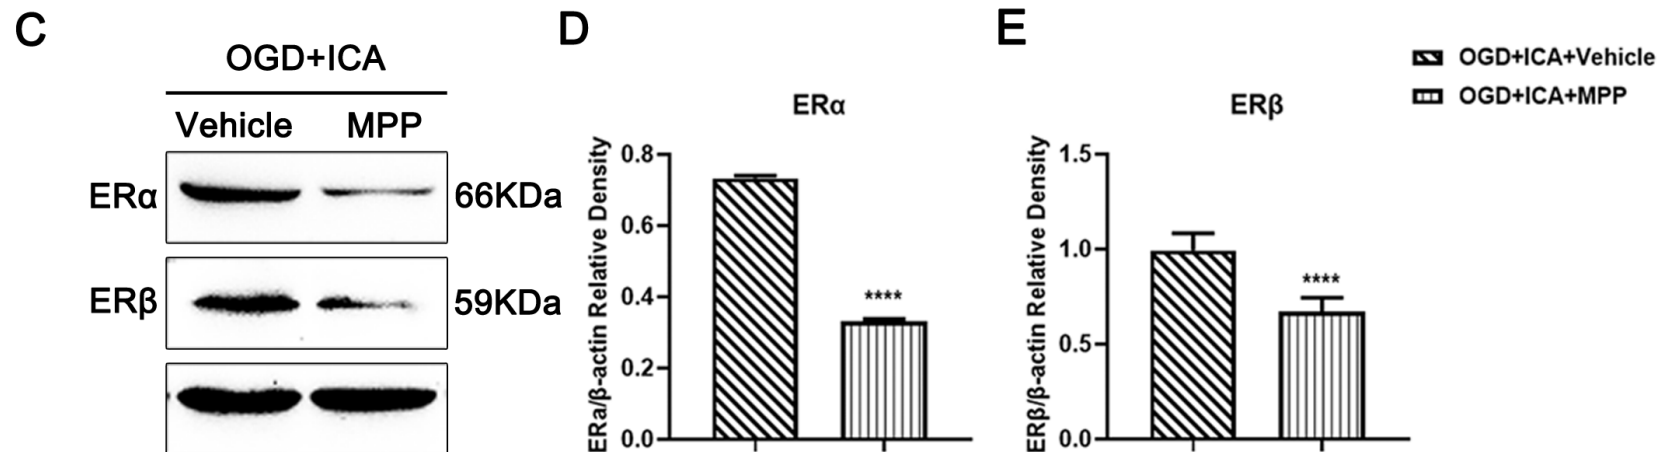

Supplement: f1 [file 1330928.f1.zip]

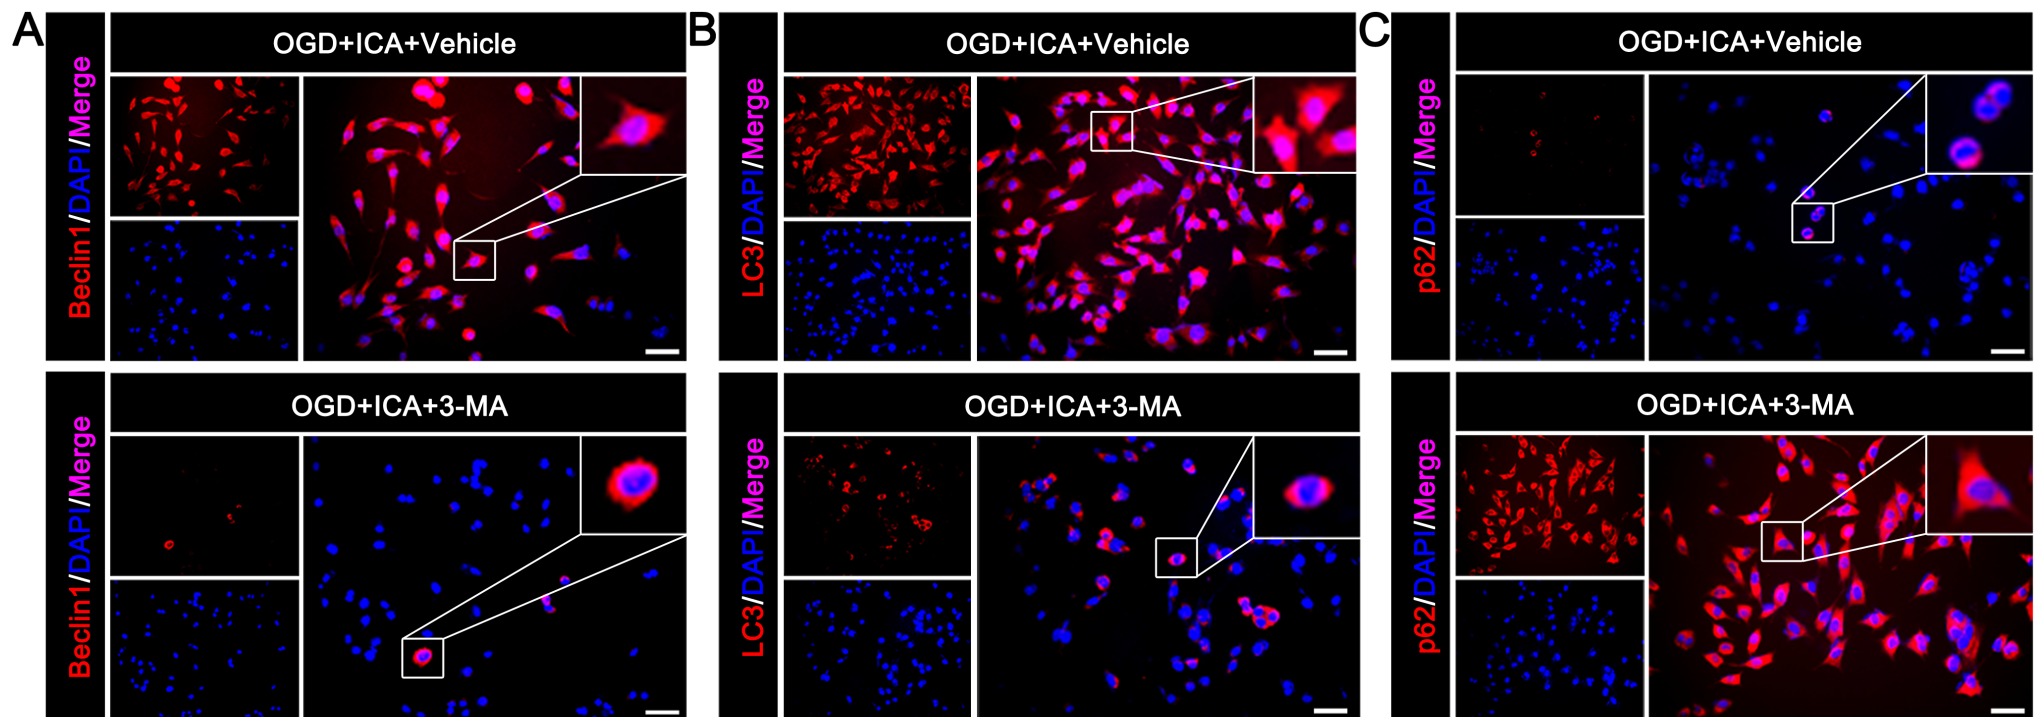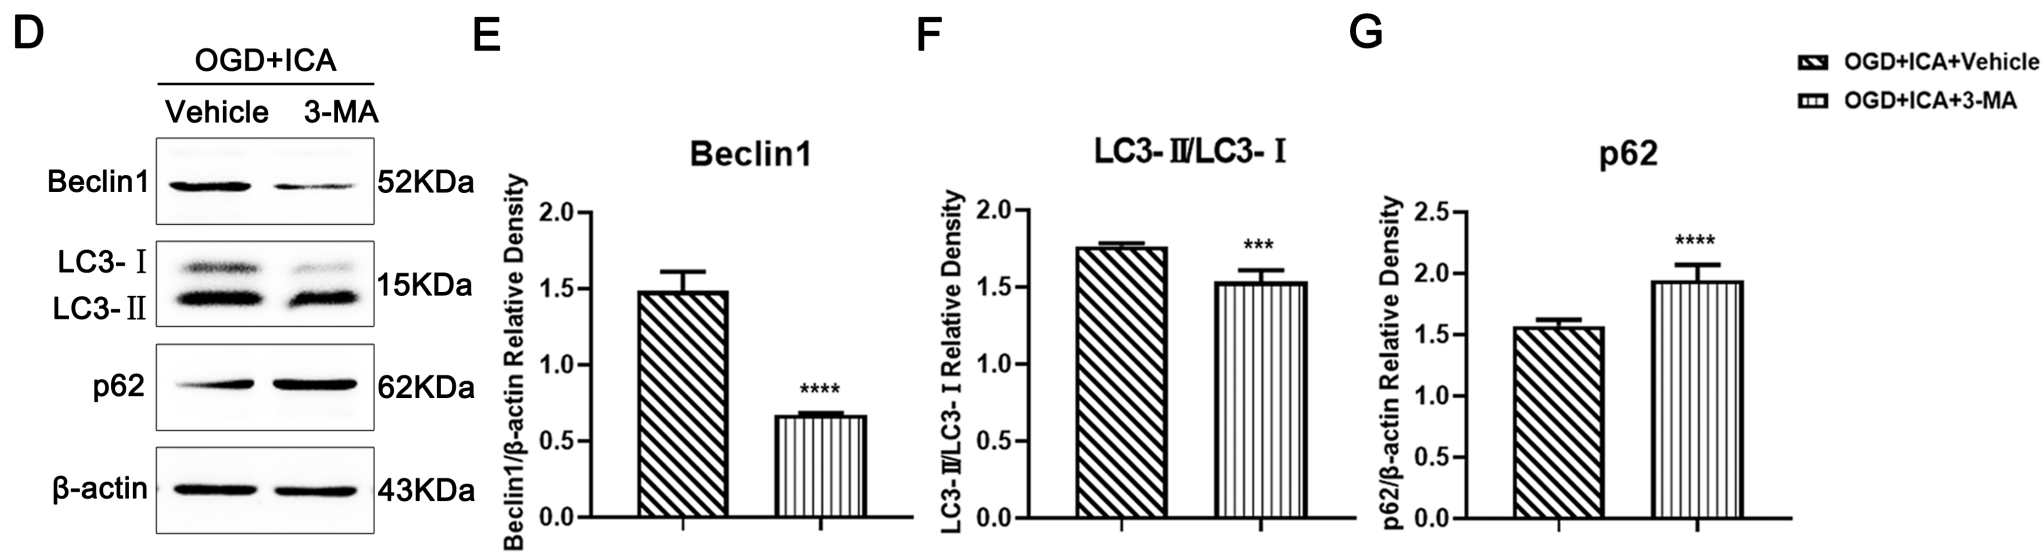

Supplement: f1 [file 1330928.f1.zip]

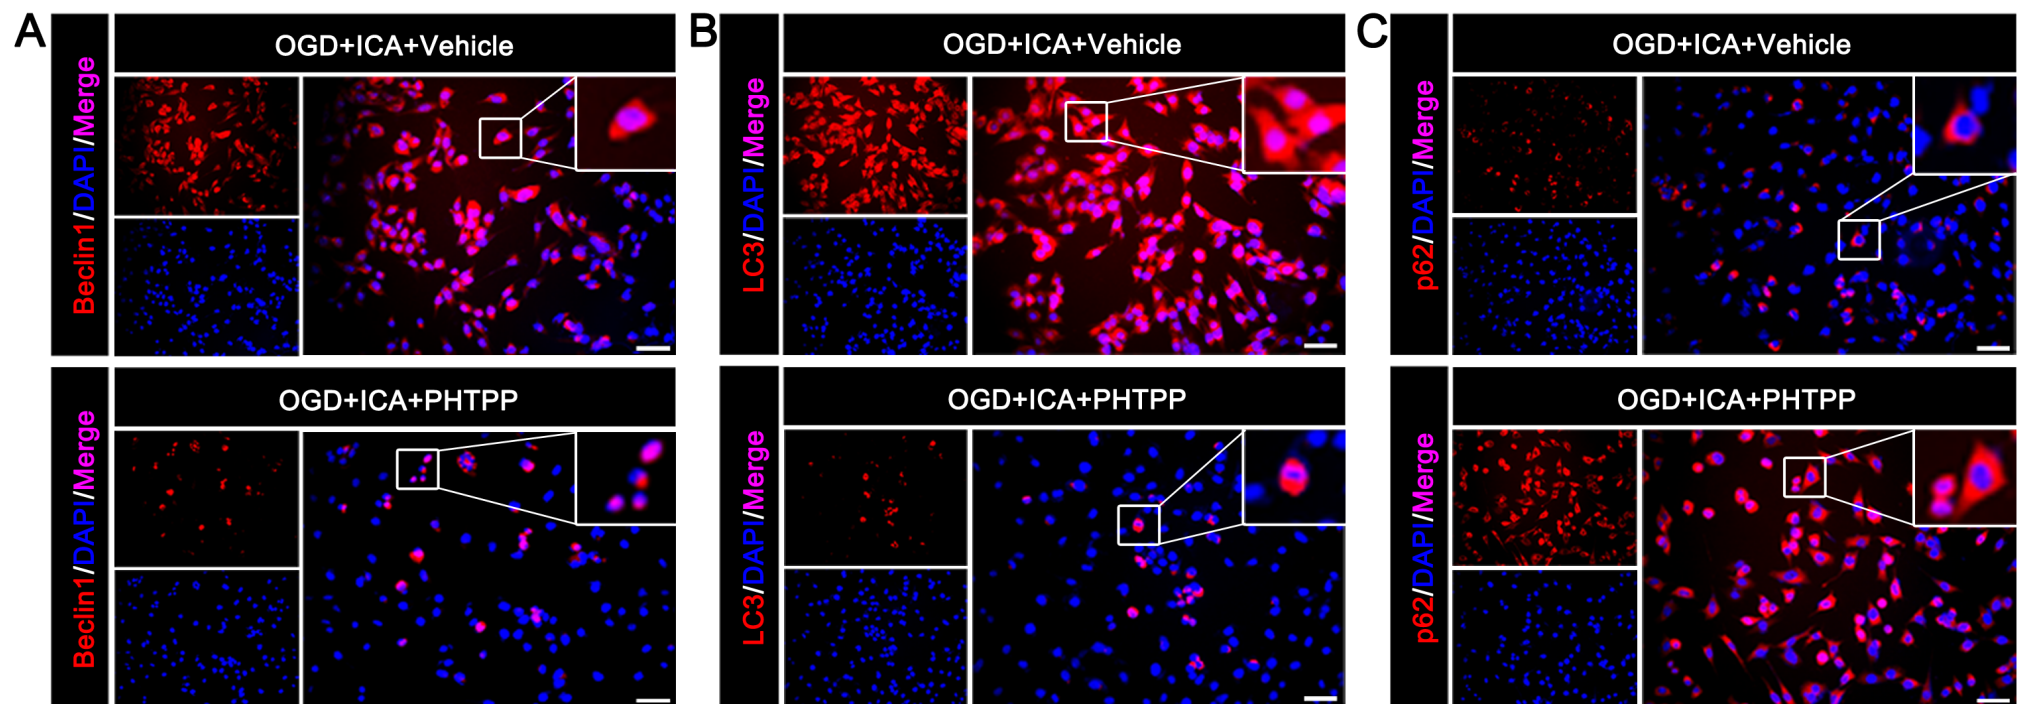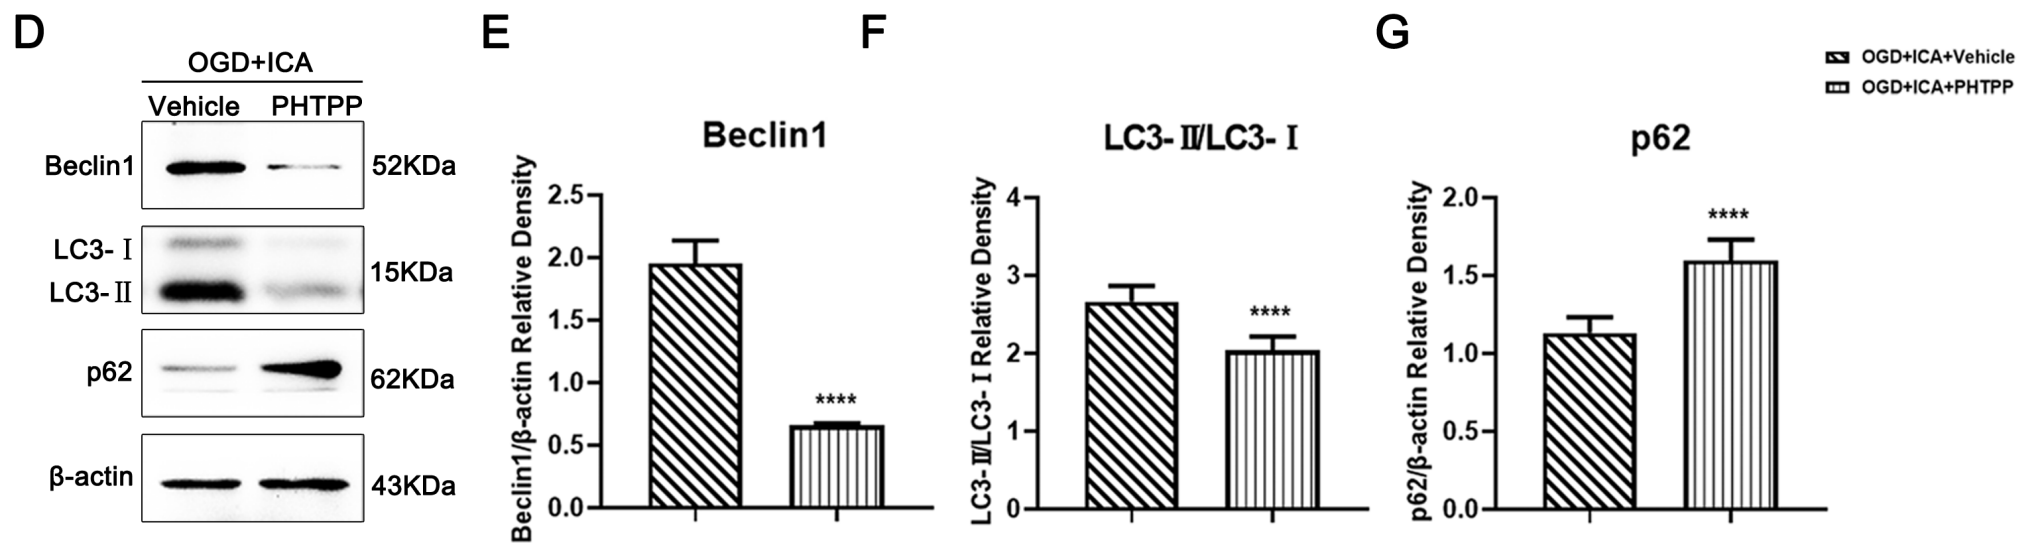

Supplement: f1 [file 1330928.f1.zip]

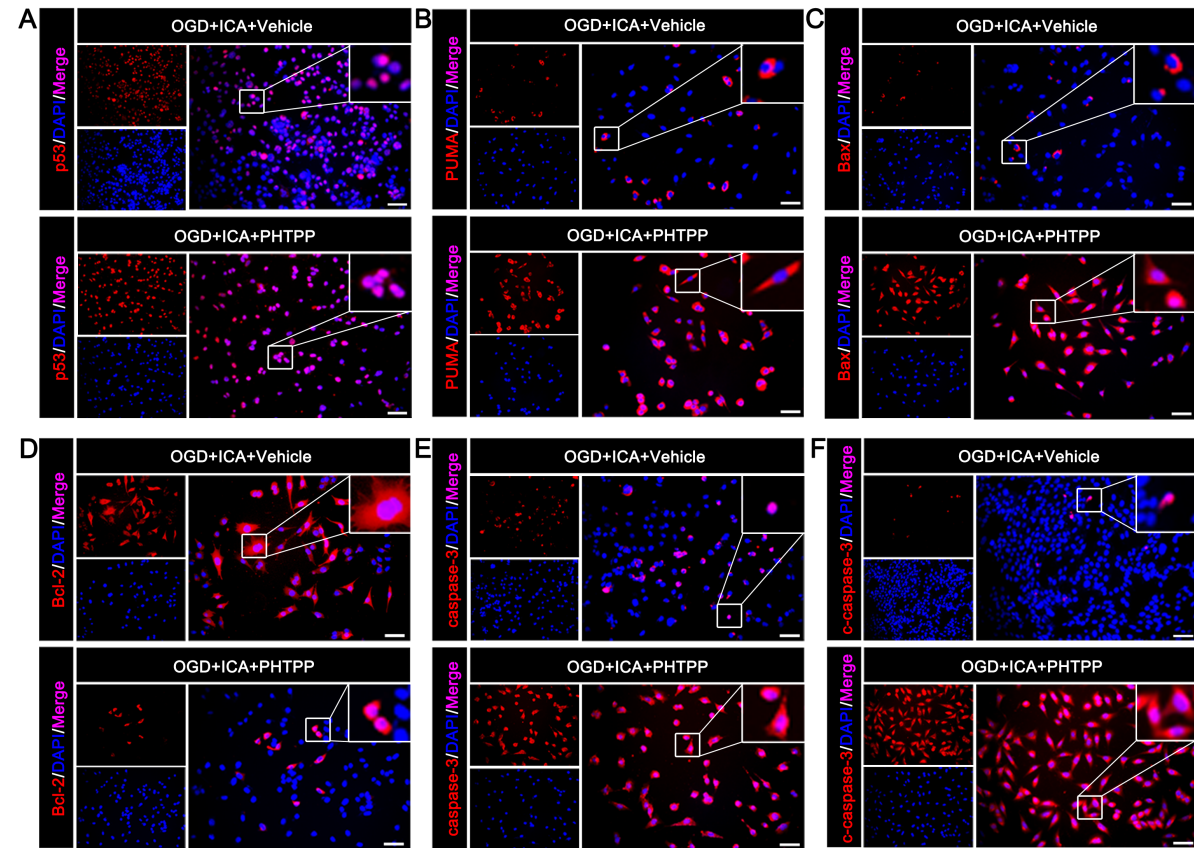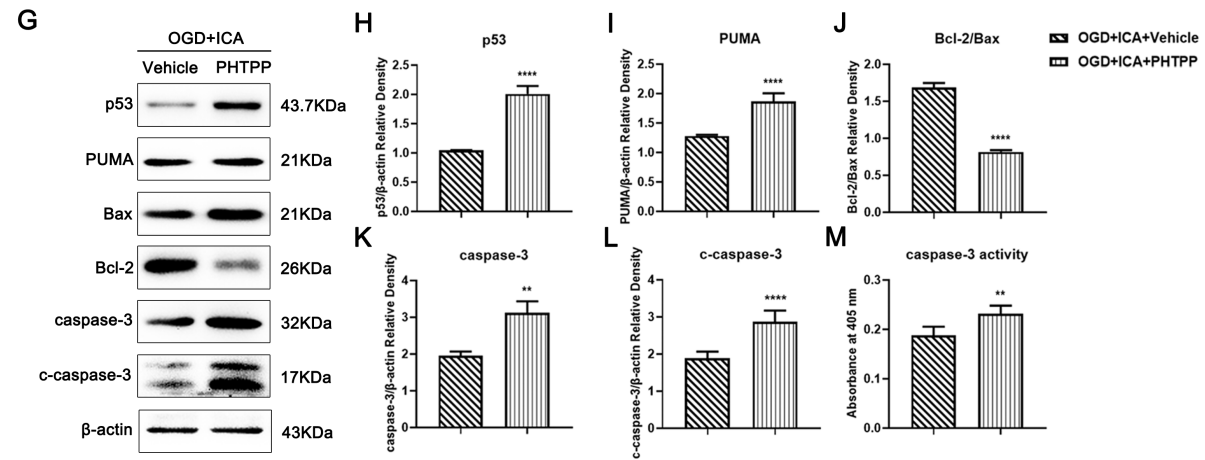

Supplement: f1 [file 1330928.f1.zip]

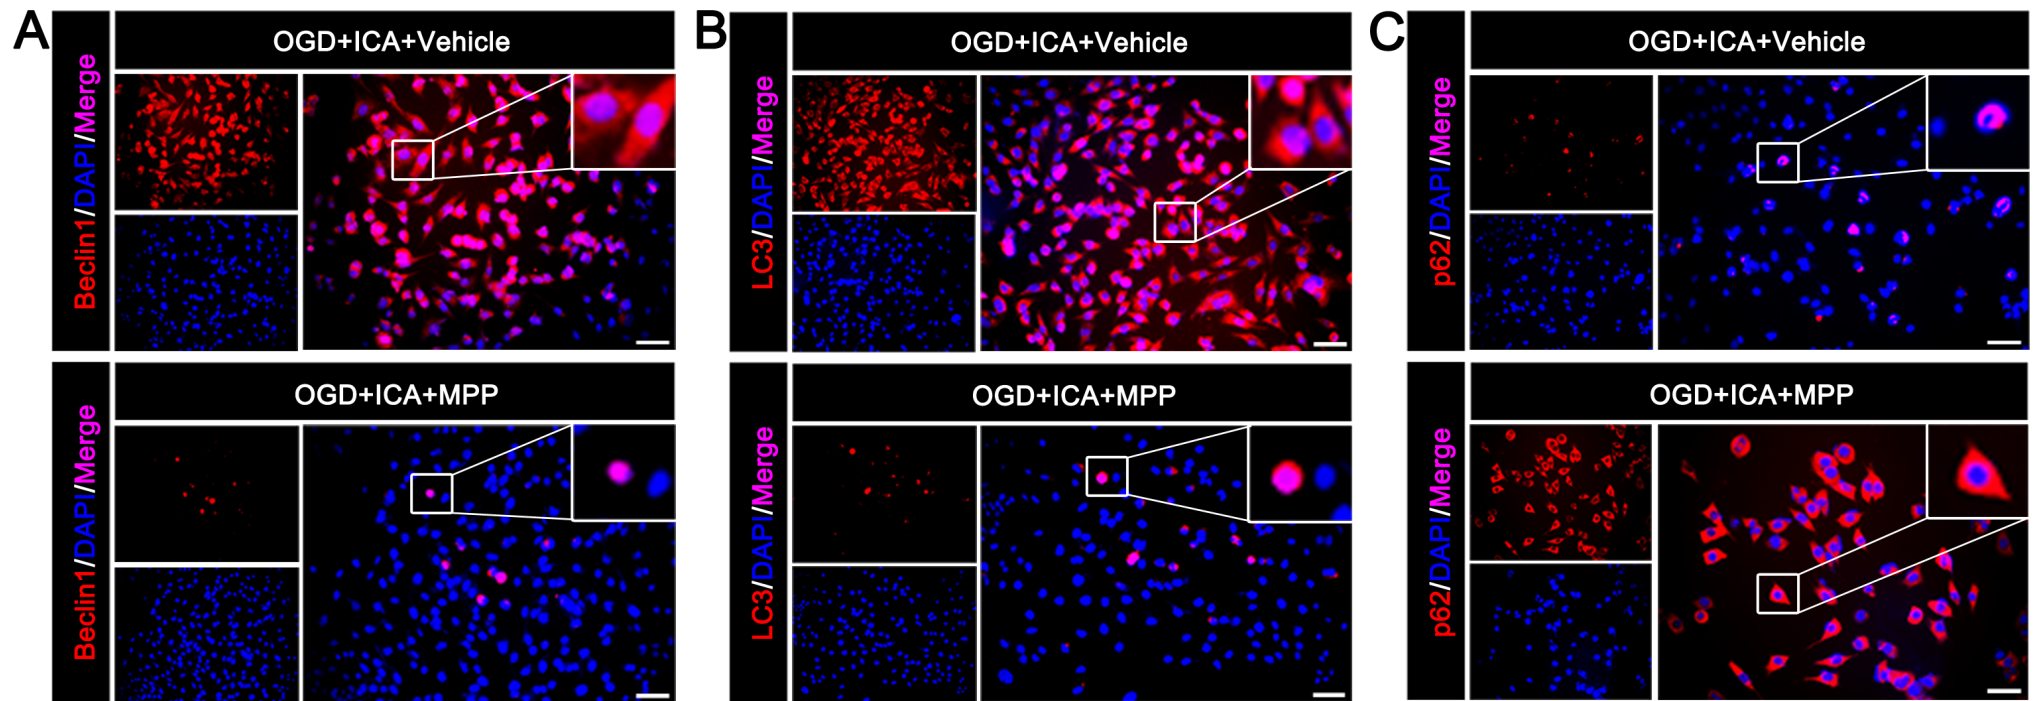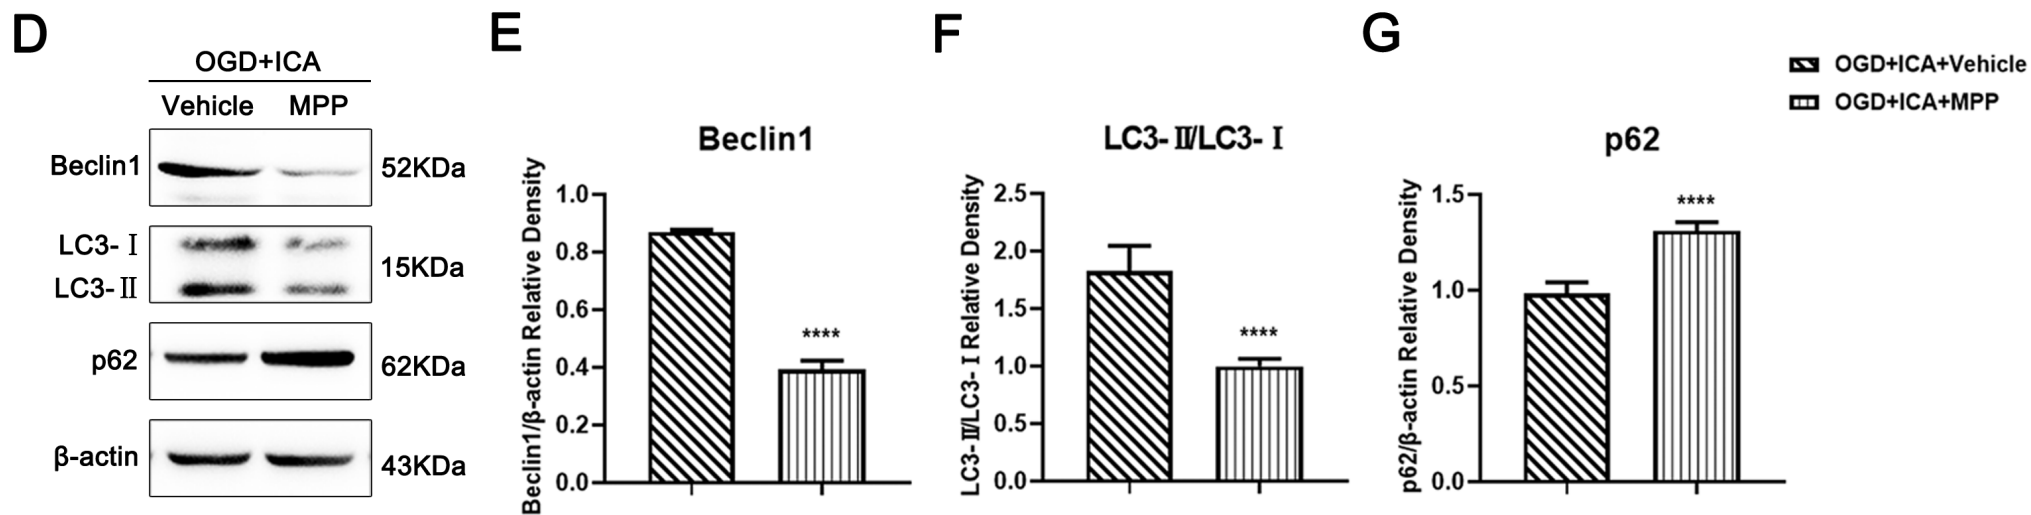

Supplement: f1 [file 1330928.f1.zip]

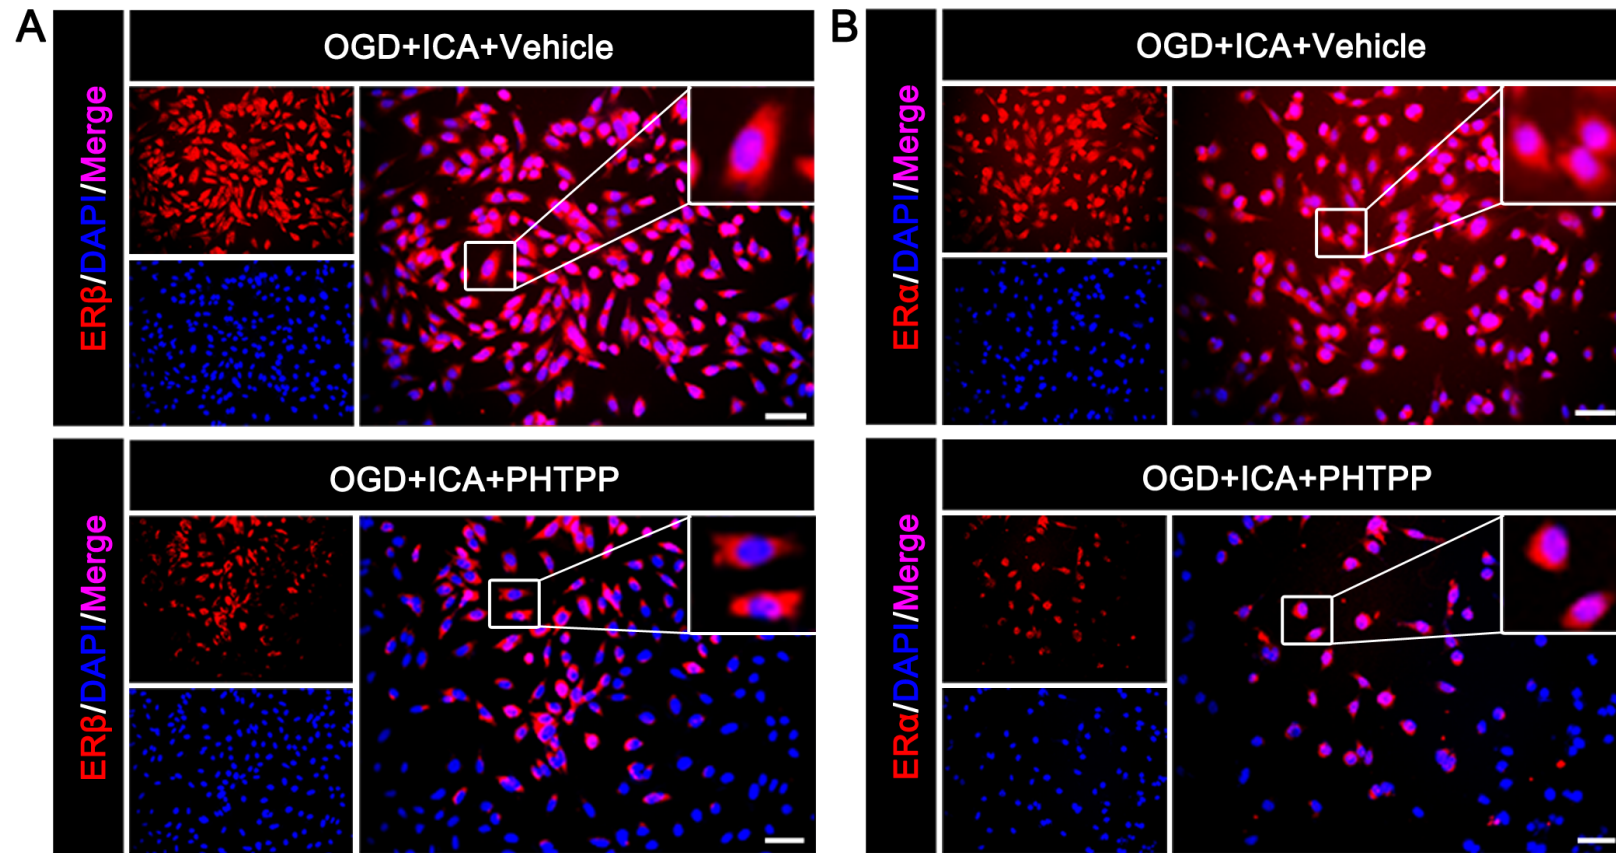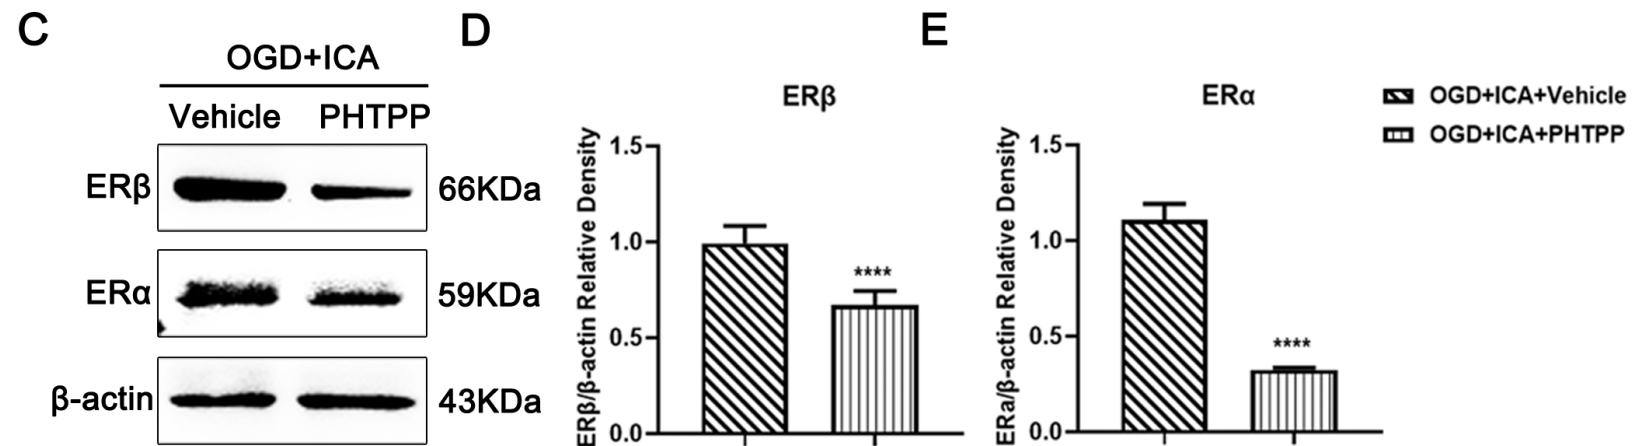

Supplement: f1 [file 1330928.f1.zip]

**A**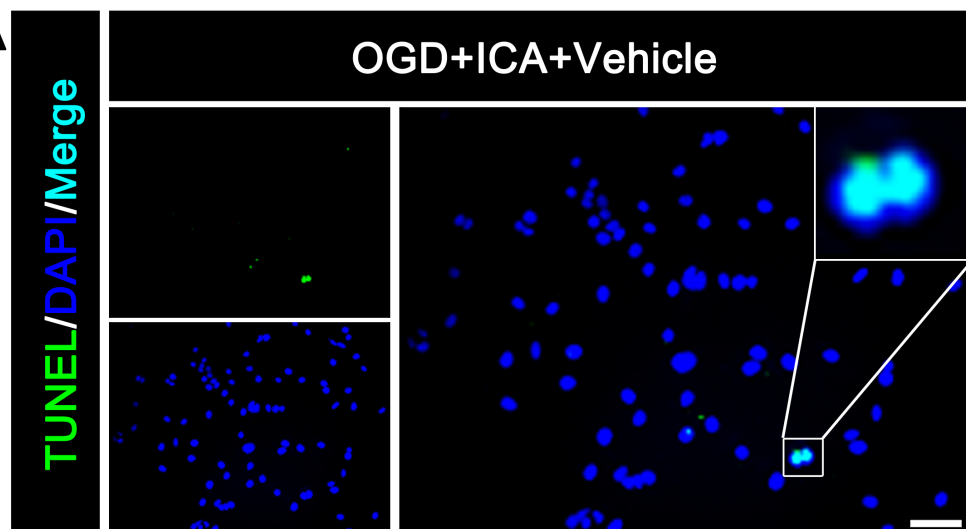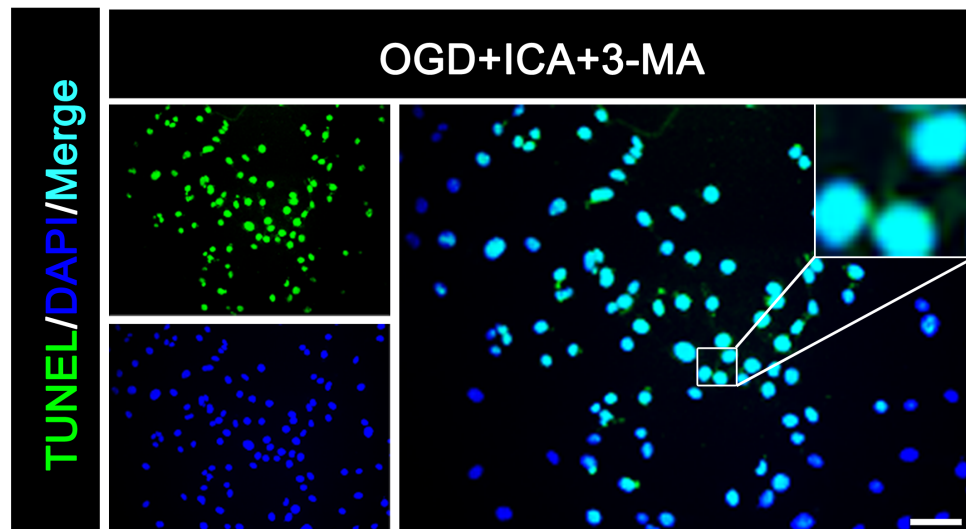**B**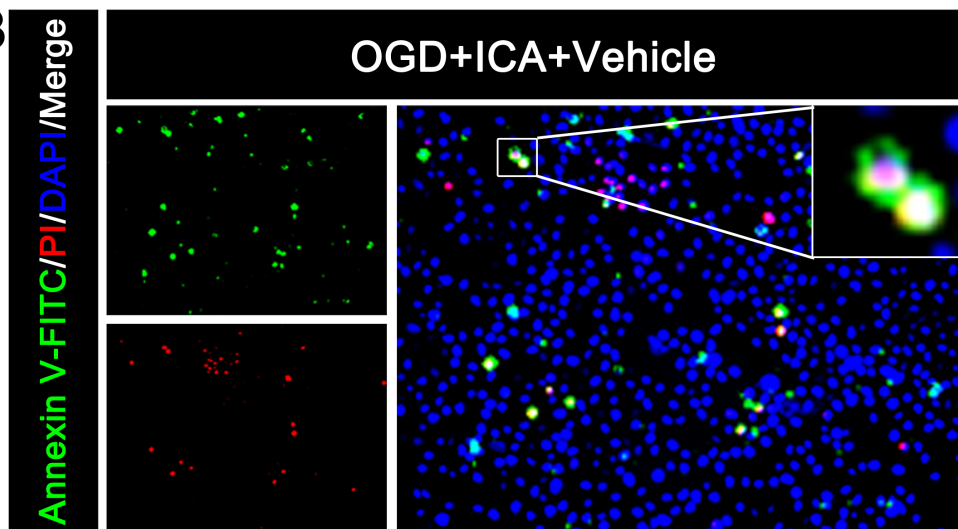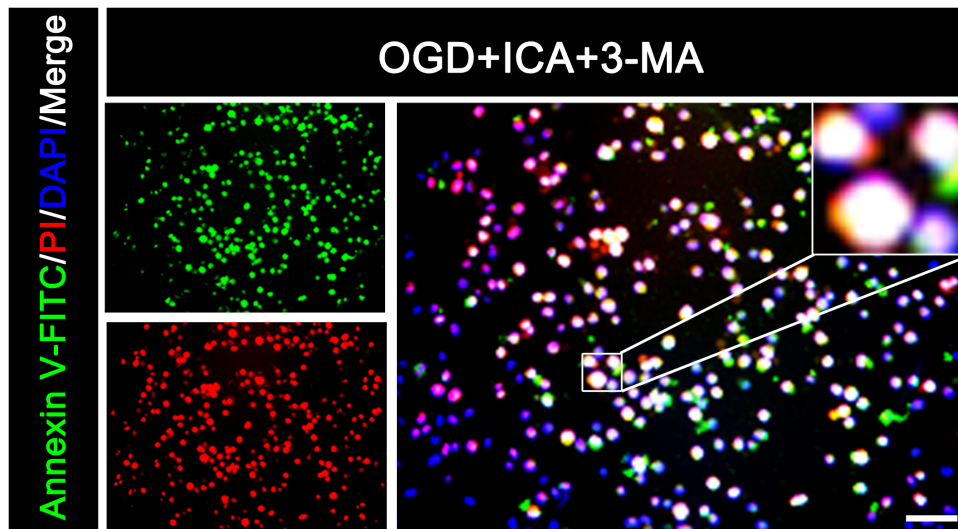

Supplement: f1 [file 1330928.f1.zip]

**A**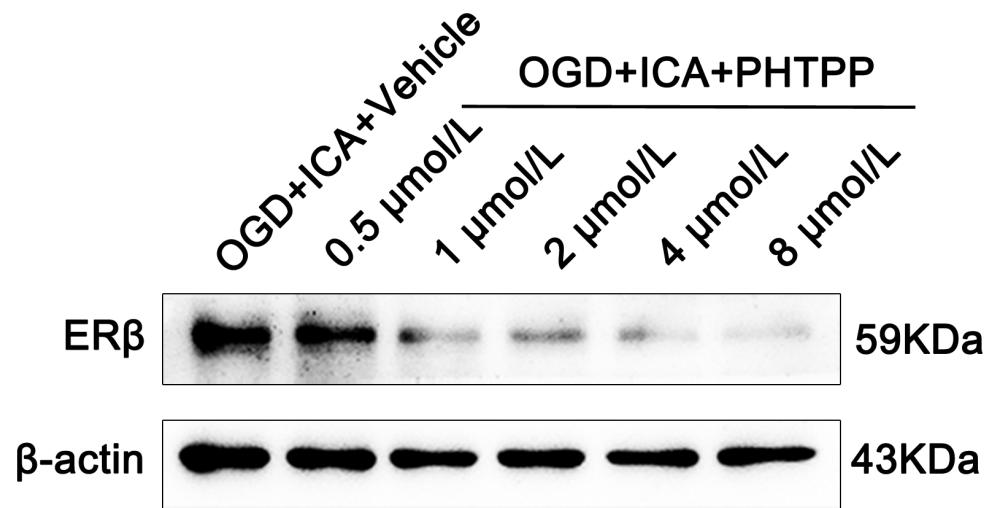**B**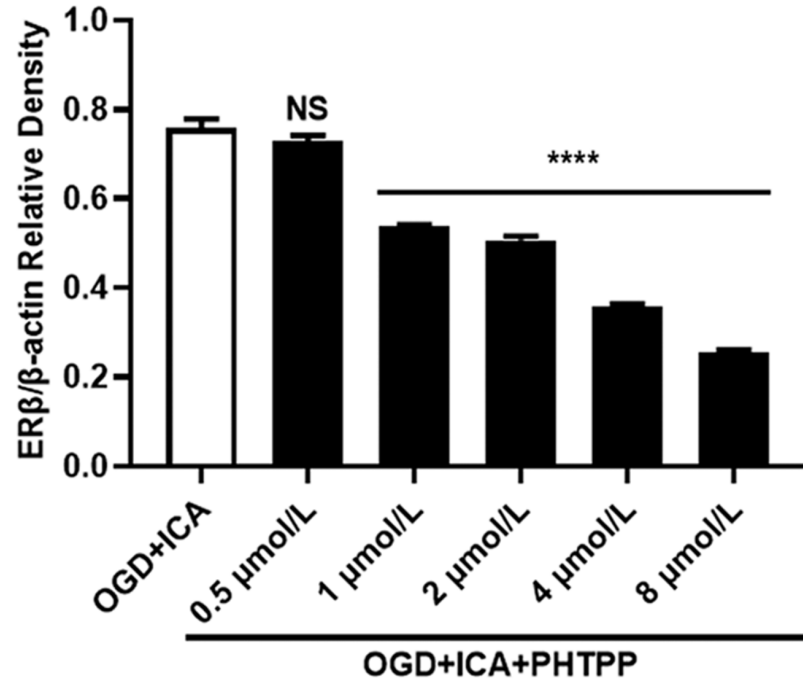**C**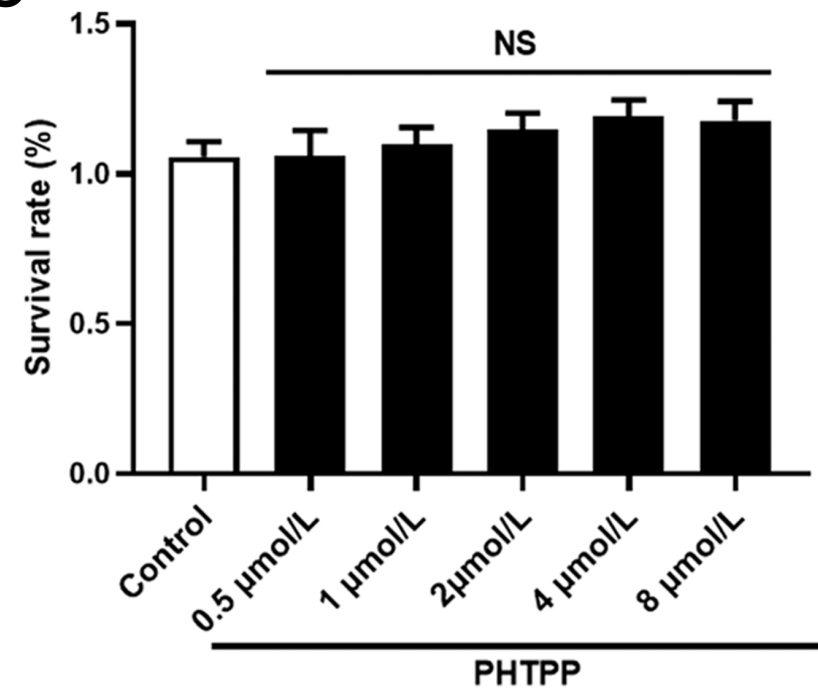

Supplement: f1 [file 1330928.f1.zip]

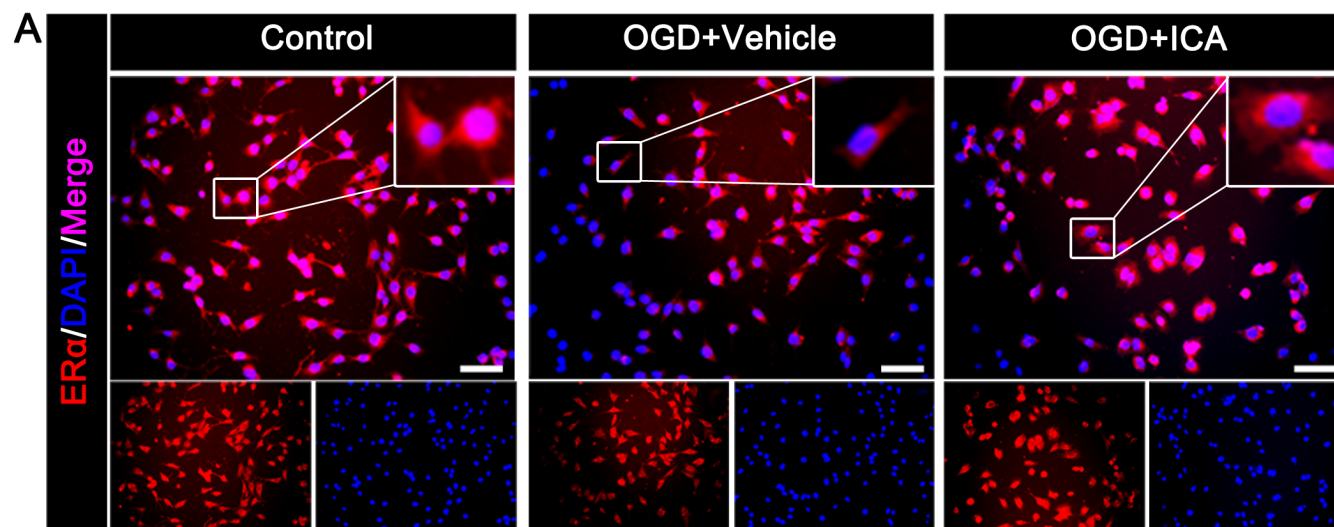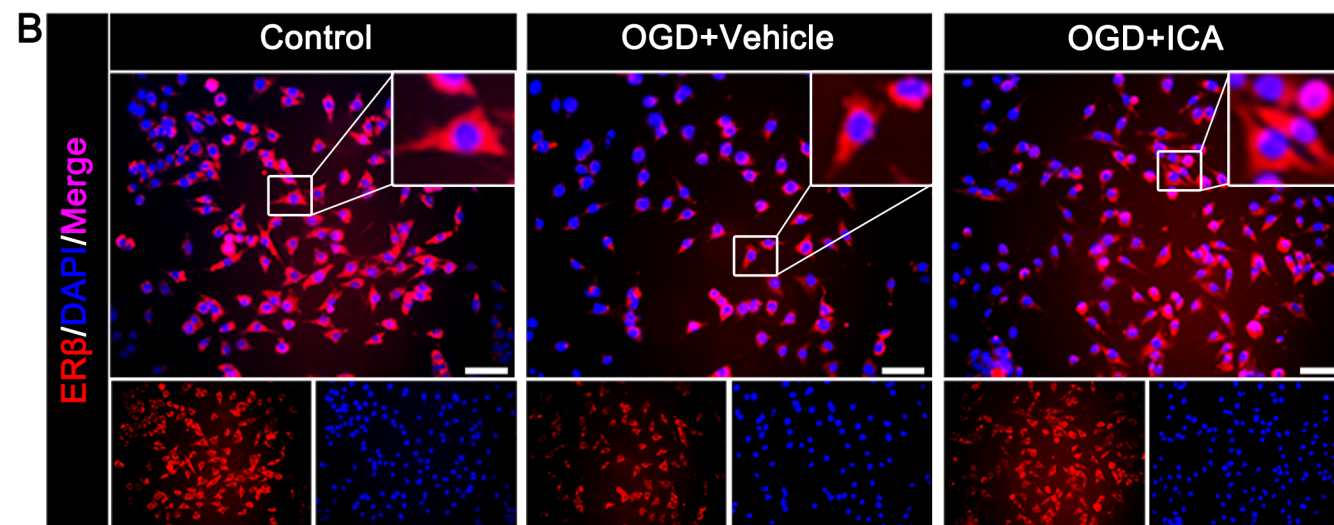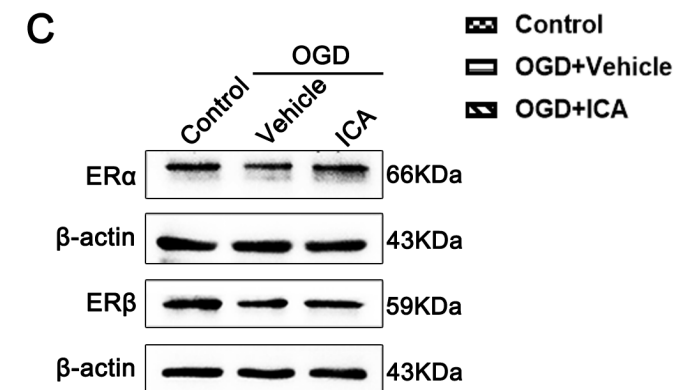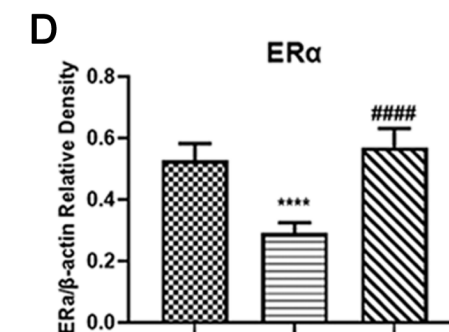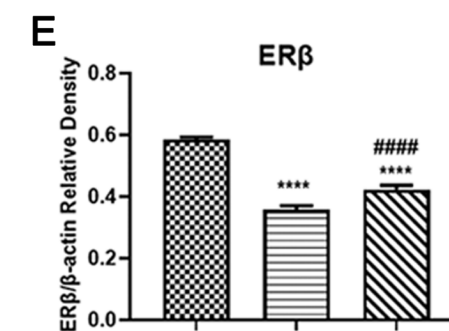

Supplement: f1 [file 1330928.f1.zip]

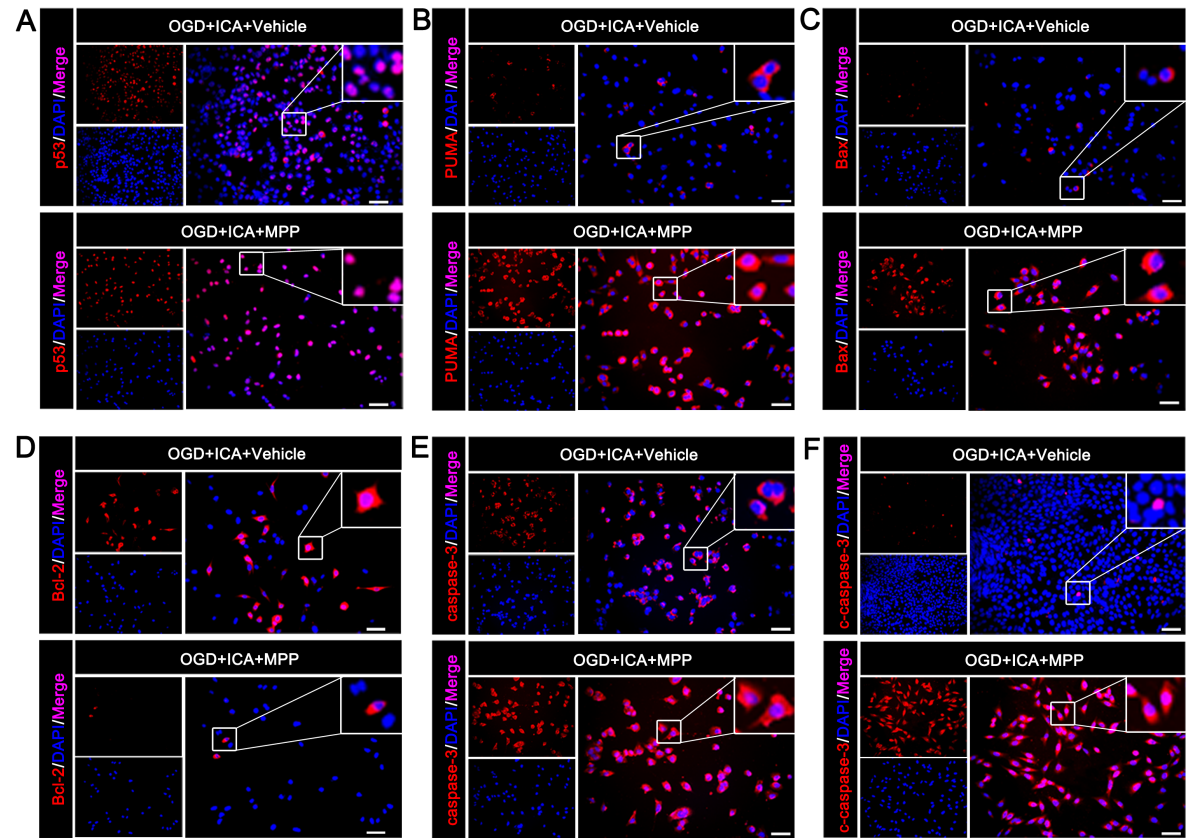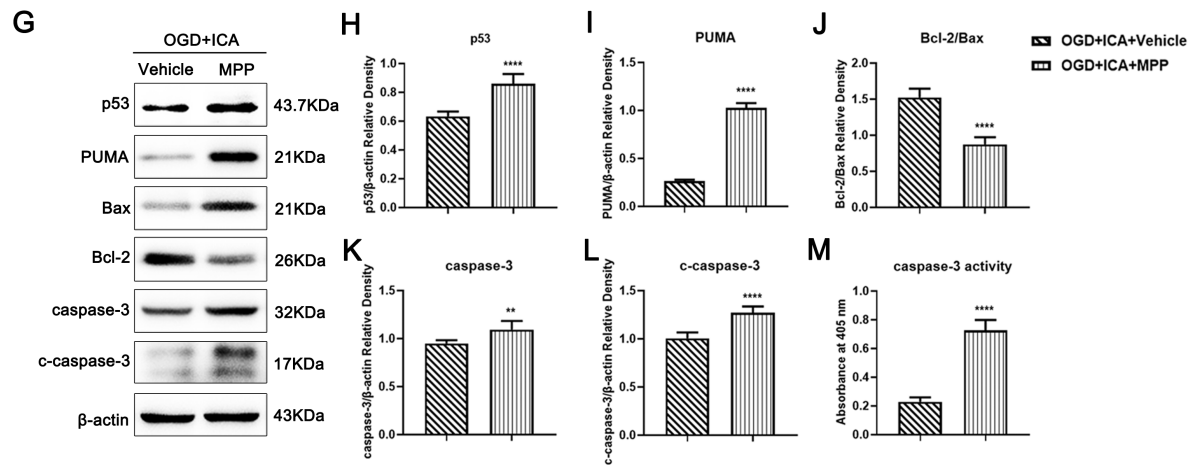

Supplement: f1 [file 1330928.f1.zip]

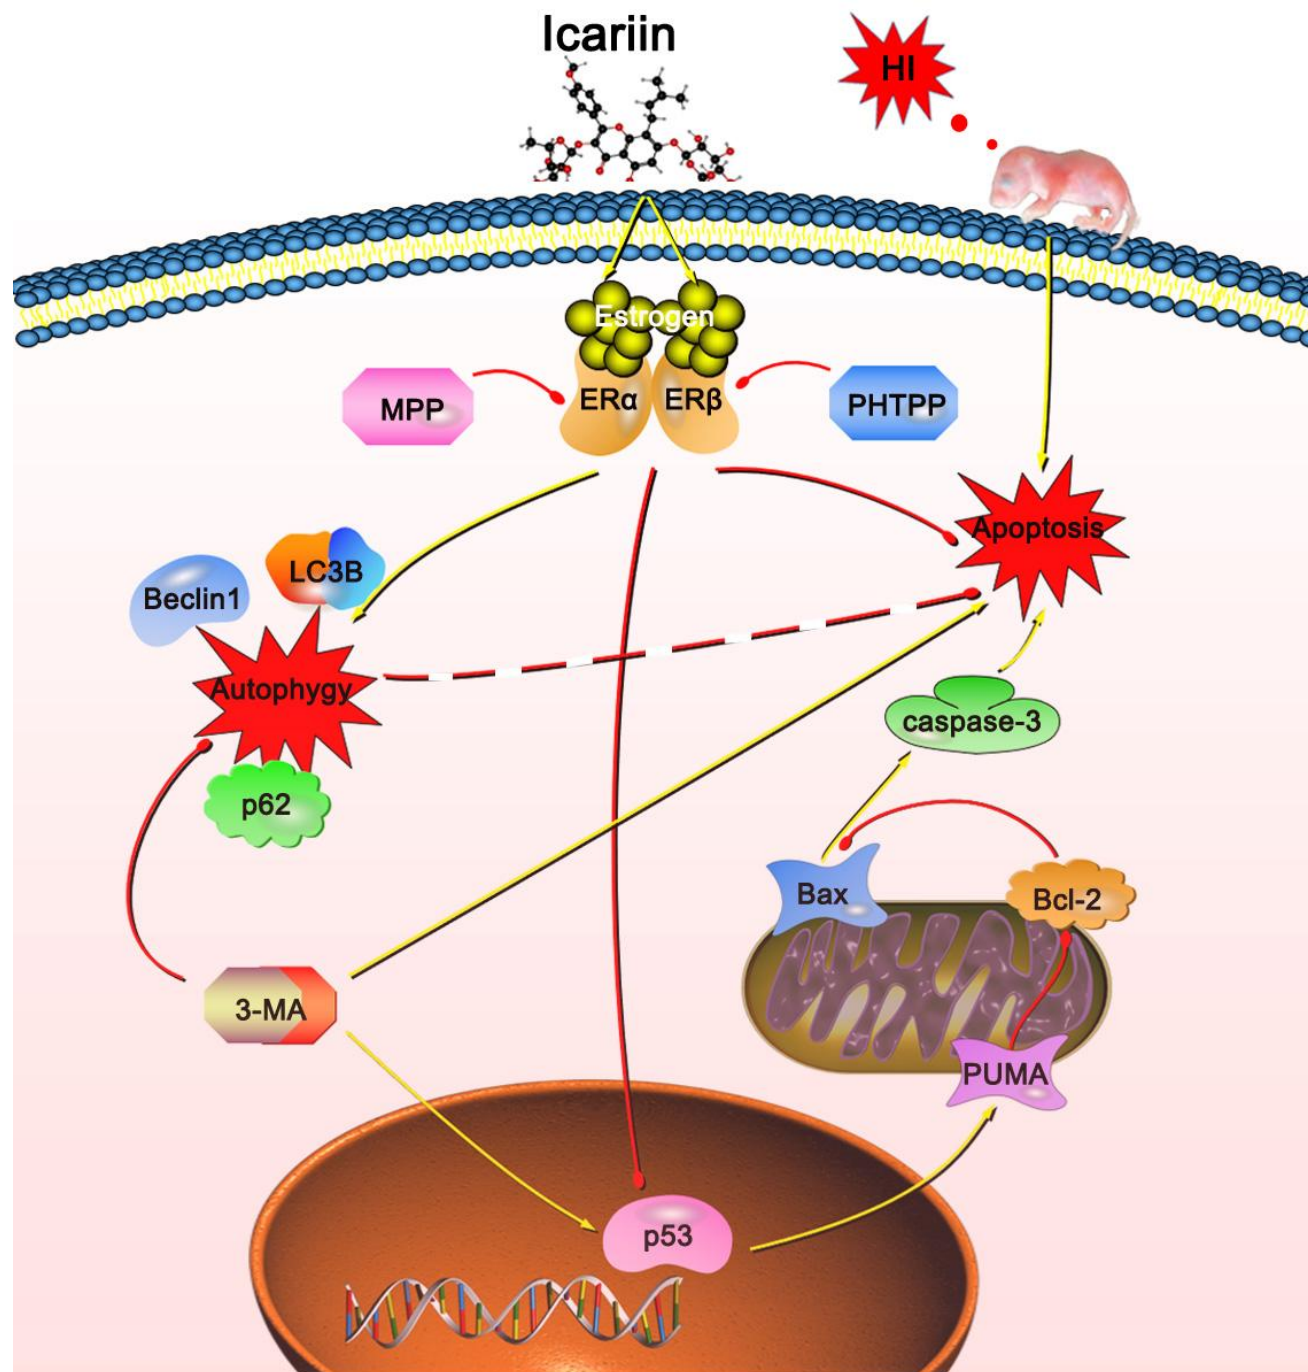

Supplement: f1 [file 1330928.f1.zip]

**A**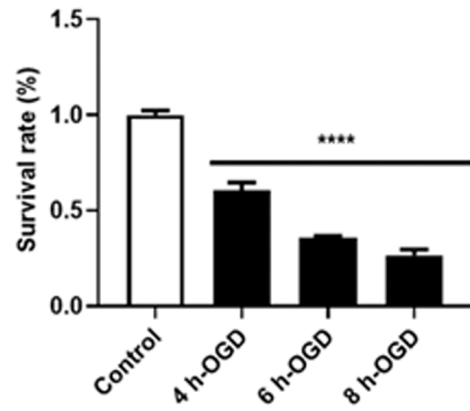**B**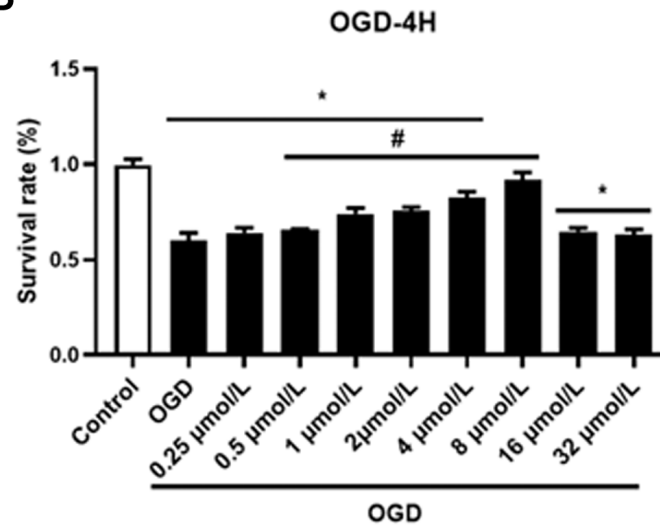**C**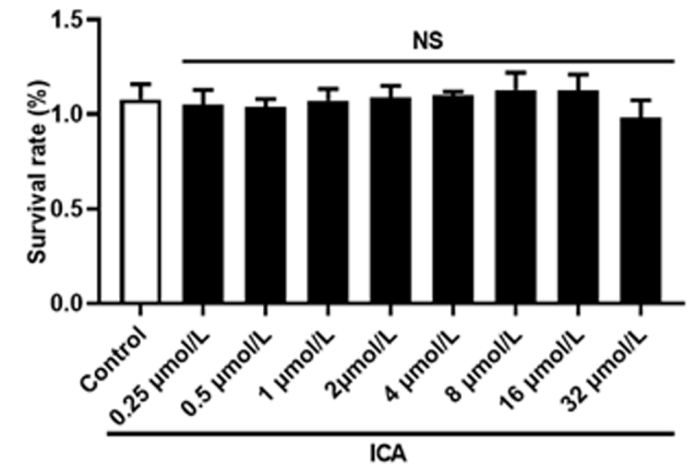**D**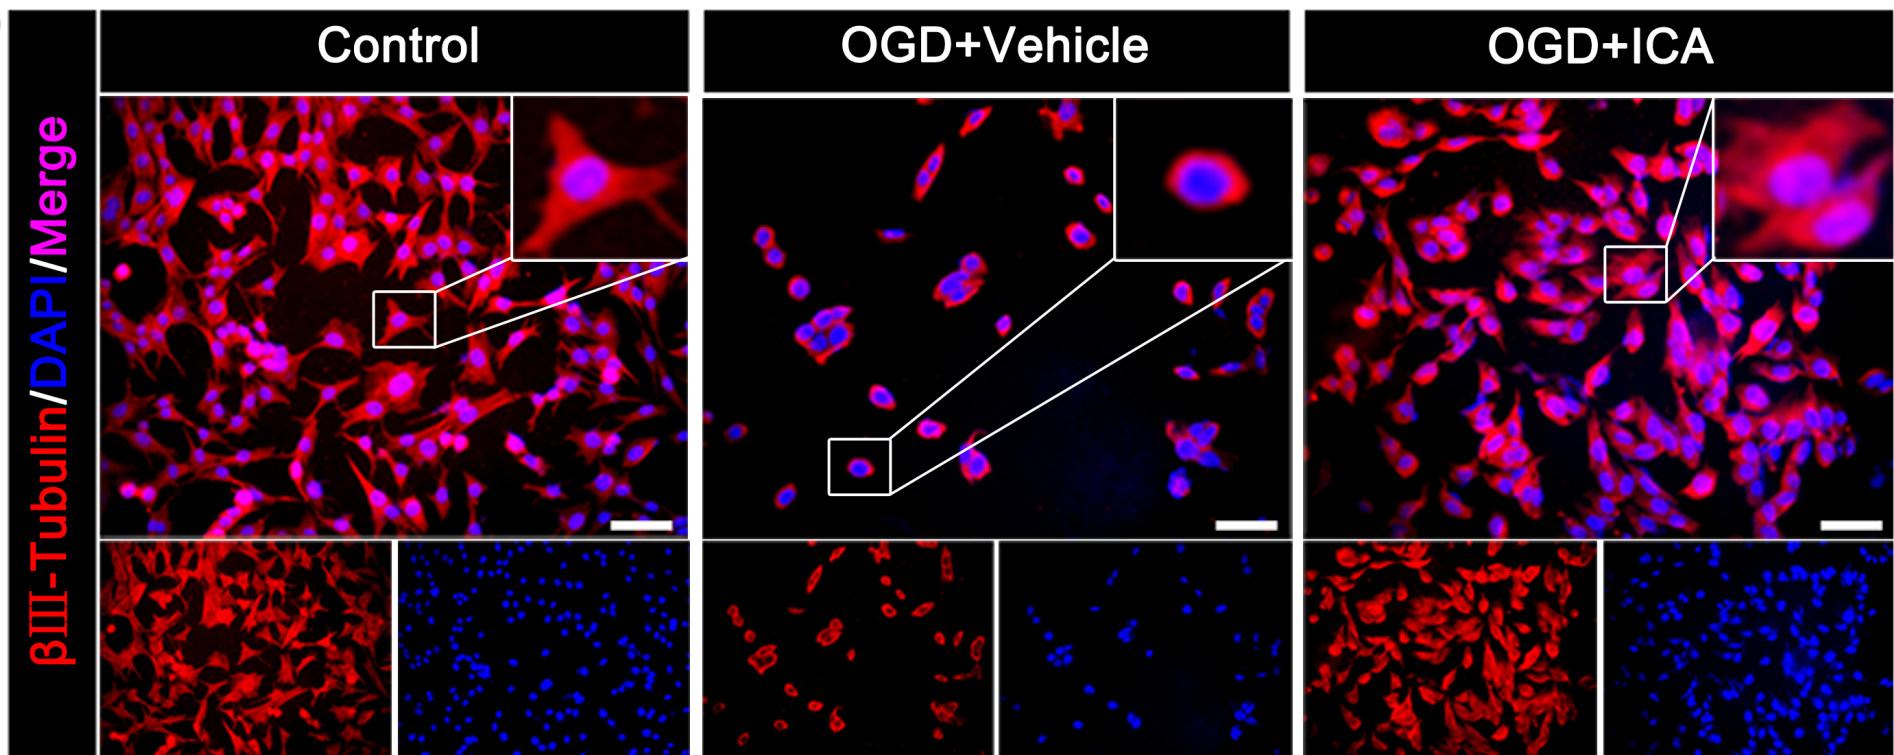

Supplement: f1 [file 1330928.f1.zip]
